# Supplementary material
Source: Springer Nature journal article supplement (https://www.springermedizin.de/resource/supplementary/12889_2009_1875_MOESM3_ESM.pdf/9504264)
Supplement: MOESM3 [file 9504264]

## **Begin well with brainstorming**

Begin with broad brainstorming approach, celebrate successes, incorporate feedback from the Audit Trigger Questions, list issues without censure or debate. Do not discuss solutions until all issues are on the table.

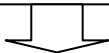

Prioritise the issues which will be discussed in detail

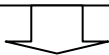

Work through each prioritised issue in turn.

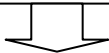

Options and recommendations for improvement are narrowed down and a set of actions are developed.

**Finish well with a list of practical actions**
